# Supplementary material for: Ambient and high-pressure kinetic investigation of methanol substitution in fac-[Re(Trop)(CO)3(MeOH)] by different monodentate nucleophiles
Source: Royal Society of Chemistry journal article supplement (doi:10.1039/c9dt01528k), 2019-01-01
Supplement: c9dt01528k1.pdf [file c9dt01528k1.pdf]

# Ambient and High Pressure Kinetic Investigation of the Methanol Substitution in *fac*-[Re(Trop)(CO)<sub>3</sub>(MeOH)] by Different Monodentate Nucleophiles

*Marietjie Schutte-Smith, Andreas Roodt\* and Hendrik G. Visser\**

Department of Chemistry, University of the Free State, PO Box 339, Bloemfontein, 9300.

| Item                                                                                    | Page |
|-----------------------------------------------------------------------------------------|------|
| Table S1: Temperature and [Br] dependence at different temperatures                     | 2    |
| Figure S1: Plot of $k_{\text{obs}}$ vs [Br] at different temperatures                   | 2    |
| Table S2: Summary of the rate constants and activation parameters for bromide as ligand | 3    |
| Figure S2: Eyring plot for bromide as ligand                                            | 3    |
| Table S3: Temperature and [I <sup>-</sup> ] dependence at different temperatures        | 4    |
| Figure S3: Plot of $k_{\text{obs}}$ vs [I <sup>-</sup> ] at different temperatures      | 4    |
| Table S4: Summary of the rate constants and activation parameters for iodide as ligand  | 5    |
| Figure S4: Eyring plot for iodide as ligand                                             | 5    |
| Table S5: Temperature and [py] dependence at different temperatures                     | 6    |
| Figure S5a: Plot of $k_{\text{obs}}$ vs [py] at different temperatures                  | 6    |
| Figure S5b: Global fit of $k_{\text{obs}}$ vs [py] at different temperatures            | 7    |
| Table S6: Summary of the rate constants and activation parameters for py as ligand      | 7    |
| Figure S6: Eyring plot for py as ligand                                                 | 7    |
| Table S7: Temperature and [Im] dependence at different temperatures                     | 8    |
| Figure S7: Plot of $k_{\text{obs}}$ vs [Im] at different temperatures                   | 9    |
| Table S8: Summary of the rate constants and activation parameters for Im as ligand      | 9    |
| Figure S8: Eyring plot for Im as ligand                                                 | 9    |
| Table S9: Temperature and [NCS] dependence at different temperatures                    | 10   |
| Figure S9: Plot of $k_{\text{obs}}$ vs [NCS] at different temperatures                  | 10   |
| Table S10: Summary of the rate constants and activation parameters for NCS as ligand    | 11   |
| Figure S10: Eyring plot for NCS as ligand                                               | 11   |
| Table S11: Temperature and [DMAP] dependence at different temperatures                  | 12   |
| Figure S11: Plot of $k_{\text{obs}}$ vs [DMAP] at different temperatures                | 12   |
| Table S12: Summary of the rate constants and activation parameters for DMAP as ligand   | 13   |
| Figure S12: Eyring plot for DMAP as ligand                                              | 13   |
| Table S13: Temperature and [TU] dependence at different temperatures                    | 14   |
| Figure S13a: Plot of $k_{\text{obs}}$ vs [TU] at different temperatures                 | 14   |
| Figure S13b: Plot of $A_{\text{obs}}$ vs [TU] to determine $K_L$                        | 14   |
| Table S14: Summary of the rate constants and activation parameters for TU as ligand     | 15   |
| Figure S14: Eyring plot for TU as ligand                                                | 15   |
| Table S15: Temperature and [MeTU] dependence at different temperatures                  | 16   |
| Figure S15: Plot of $k_{\text{obs}}$ vs [MeTU] at different temperatures                | 16   |
| Table S16: Summary of the rate constants and activation parameters for MeTU as ligand   | 17   |
| Figure S16: Eyring plot for MeTU as ligand                                              | 17   |
| Figure S17: Plot of $k_{\text{obs}}$ vs [ligand] at 25°C for eight ligands              | 18   |
| Table S17a: Pressure dependence for $k_{\text{obs}}$ for py                             | 19   |
| Table S17a: Pressure dependence for $k_{\text{obs}}$ for Im                             | 19   |
| Table S17a: Pressure dependence for $k_{\text{obs}}$ for TU                             | 19   |
| Table S17a: Pressure dependence for $k_{\text{obs}}$ for MeTU                           | 19   |

## Supplementary Data

The methanol substitution reactions between *fac*-[Re(Trop)(CO)<sub>3</sub>(MeOH)] and bromide ions (Br<sup>-</sup>), iodide ions (I<sup>-</sup>), pyridine (Py), imidazole (Im), thiocyanate ions (NCS<sup>-</sup>), thiourea (TU) and 1-methyl-2-thiourea as entering ligands were followed. Each reaction was performed at four temperatures (approximately 15, 25, 35 and 45 °C) and the Rhenium concentration was kept constant at 1 x 10<sup>-4</sup> M throughout.

**Table S1: Temperature and [Br<sup>-</sup>] dependence of the *pseudo* first-order reaction between *fac*-[Re(Trop)(CO)<sub>3</sub>(MeOH)] and bromide ions. [Re] = 1 x 10<sup>-4</sup> M, λ = 430 nm, MeOH.**

| [Br <sup>-</sup> ] (M) | <i>k</i> <sub>obs</sub> (s <sup>-1</sup> ) |           |           |           |
|------------------------|--------------------------------------------|-----------|-----------|-----------|
|                        | 15.7 °C                                    | 25.1 °C   | 34.9 °C   | 44.9 °C   |
| 0.2                    | 0.204(6)                                   | 0.578(3)  | 1.6810(7) | 3.9610(7) |
| 0.3                    | 0.223(8)                                   | 0.628(2)  | 1.826(3)  | 4.335(2)  |
| 0.4                    | 0.241(3)                                   | 0.6799(6) | 1.968(3)  | 4.700(2)  |
| 0.5                    | 0.2601(2)                                  | 0.729(1)  | 2.1084(8) | 5.085(3)  |

**Figure S1: Plot of *k*<sub>obs</sub> vs [Br<sup>-</sup>] for the reaction between *fac*-[Re(Trop)(CO)<sub>3</sub>(MeOH)] and bromide ions at different temperatures. [Re] = 1.0 x 10<sup>-4</sup> M, [Br<sup>-</sup>] = 2.0 x 10<sup>-1</sup> M – 5.0 x 10<sup>-1</sup> M, 430 nm, MeOH.**

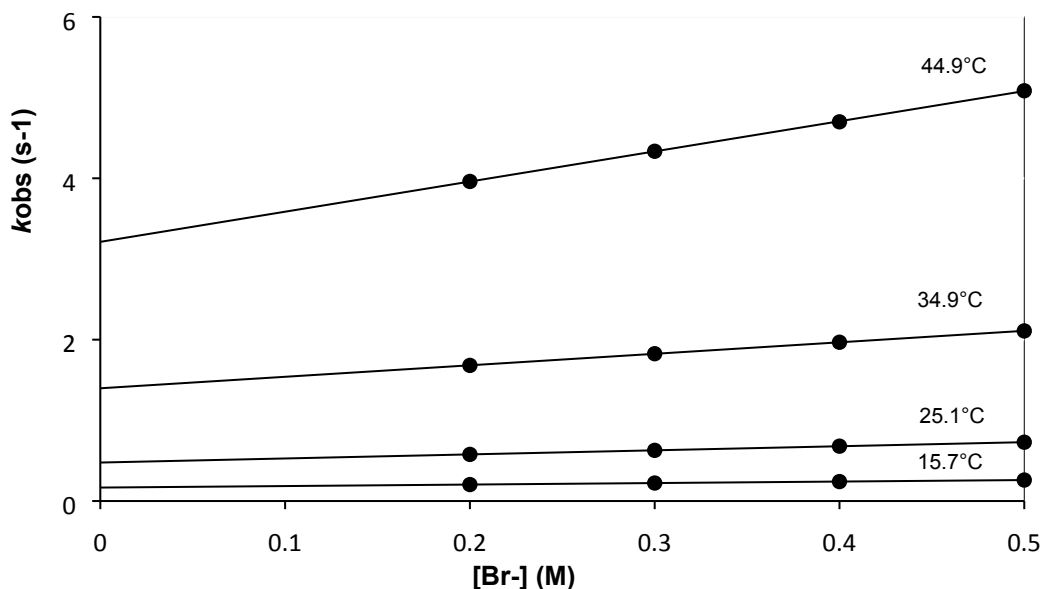

**Table S2: Summary of the rate constants and activation parameters of the reaction between *fac*-[Re(Trop)(CO)<sub>3</sub>(MeOH)] and bromide ions at different temperatures.**

|                                                                    | 15.7 °C   | 25.1 °C  | 34.9 °C  | 44.9 °C |
|--------------------------------------------------------------------|-----------|----------|----------|---------|
| $k_L$ (M <sup>-1</sup> s <sup>-1</sup> )                           | 0.186(1)  | 0.505(4) | 1.424(7) | 3.74(3) |
| $k_{-L}$ (s <sup>-1</sup> )                                        | 0.1668(5) | 0.477(1) | 1.397(3) | 3.21(1) |
| $K_L$ (M <sup>-1</sup> )                                           | 1.115(7)  | 1.059(9) | 1.019(5) | 1.16(1) |
| $\Delta H^\ddagger_{(k_L)}$ (kJ mol <sup>-1</sup> )                |           | 76.1(6)  |          |         |
| $\Delta S^\ddagger_{(k_L)}$ (J K <sup>-1</sup> mol <sup>-1</sup> ) |           | 5(2)     |          |         |

**Figure S2: Eyring plot of  $\ln(k_L/T)$  vs  $1/T$  for the reactions between *fac*-[Re(Trop)(CO)<sub>3</sub>(MeOH)] and bromide ions for a temperature range of 15.7 °C to 44.9 °C.**

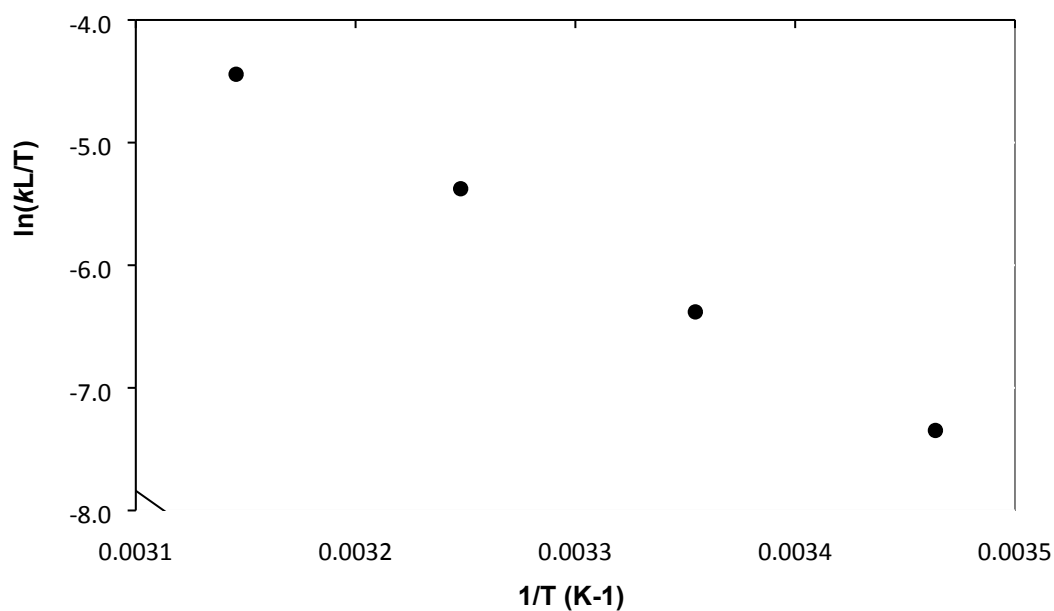

**Table S3: Temperature and [I<sup>-</sup>] dependence of the *pseudo* first-order reaction between *fac*-[Re(Trop)(CO)<sub>3</sub>(MeOH)] and iodide ions. [Re] = 1 x 10<sup>-4</sup> M, λ = 430 nm, MeOH.**

| [I <sup>-</sup> ] (M) | <i>k</i> <sub>obs</sub> (s <sup>-1</sup> ) |           |          |          |
|-----------------------|--------------------------------------------|-----------|----------|----------|
|                       | 15.8 °C                                    | 24.3 °C   | 34.4 °C  | 44.2 °C  |
| 0.2                   | 0.306(3)                                   | 0.827(4)  | 2.51(1)  | 6.146(4) |
| 0.3                   | 0.338(4)                                   | 0.902(3)  | 2.748(7) | 6.733(2) |
| 0.4                   | 0.370(2)                                   | 0.980(4)  | 2.969(6) | 7.313(3) |
| 0.5                   | 0.402(1)                                   | 1.057(4)  | 3.191(4) | 7.879(2) |
| 0.6                   | 0.433(2)                                   | 1.133(6)  | 3.411(5) | 8.45(3)  |
| 0.7                   | 0.4648(8)                                  | 1.2085(8) | 3.624(5) | 9.00(4)  |

**Figure S3: Plot of *k*<sub>obs</sub> vs [I<sup>-</sup>] for the reaction between *fac*-[Re(Trop)(CO)<sub>3</sub>(MeOH)] and iodide ions at different temperatures. [Re] = 1.0 x 10<sup>-4</sup> M, [I<sup>-</sup>] = 2.0 x 10<sup>-1</sup> M – 7.0 x 10<sup>-1</sup> M, 430 nm, MeOH.**

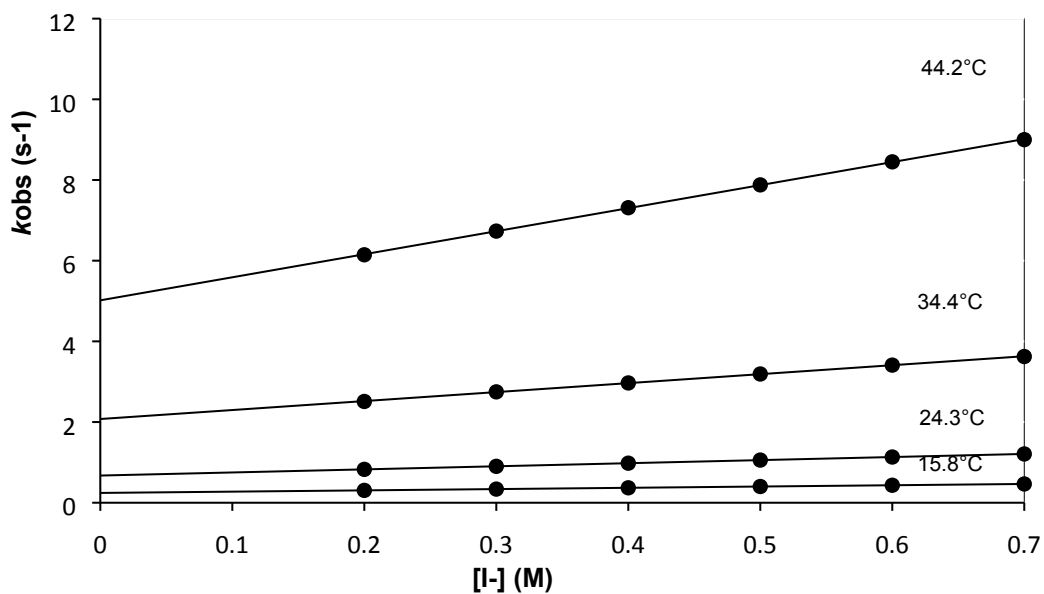

**Table S4: Summary of the rate constants and activation parameters of the reaction between *fac*-[Re(Trop)(CO)<sub>3</sub>(MeOH)] and iodide ions at different temperatures.**

|                                                                    | 15.8 °C   | 24.3 °C  | 34.4 °C  | 44.2 °C  |
|--------------------------------------------------------------------|-----------|----------|----------|----------|
| $k_L$ (M <sup>-1</sup> s <sup>-1</sup> )                           | 0.3174(8) | 0.765(2) | 2.22(2)  | 5.71(3)  |
| $k_{-L}$ (s <sup>-1</sup> )                                        | 0.2428(4) | 0.674(1) | 2.075(9) | 5.02(1)  |
| $K_L$ (M <sup>-1</sup> )                                           | 1.307(4)  | 1.136(3) | 1.07(1)  | 1.137(6) |
| $\Delta H^\ddagger_{(k_L)}$ (kJ mol <sup>-1</sup> )                |           | 75.3(9)  |          |          |
| $\Delta S^\ddagger_{(k_L)}$ (J K <sup>-1</sup> mol <sup>-1</sup> ) |           | 6(3)     |          |          |

**Figure S4: Eyring plot of  $\ln(k_L/T)$  vs  $1/T$  for the reaction between *fac*-[Re(Trop)(CO)<sub>3</sub>(MeOH)] and iodide ions for a temperature range of 15.8 °C to 44.2 °C.**

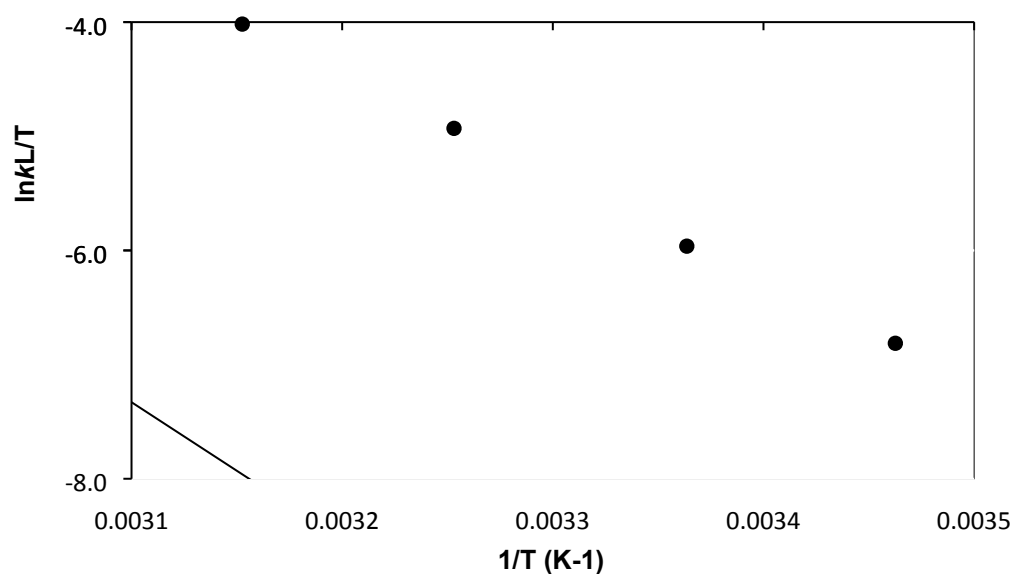

Table S5: Temperature and [Py] dependence of the *pseudo* first-order reaction between *fac*-[Re(Trop)(CO)<sub>3</sub>(MeOH)] and pyridine. [Re] = 1 x 10<sup>-4</sup> M, λ = 312 nm, MeOH.

| [Py] (M) | 10 <sup>3</sup> k <sub>obs</sub> (s <sup>-1</sup> ) |         |          |          |
|----------|-----------------------------------------------------|---------|----------|----------|
|          | 15.0 °C                                             | 25.0 °C | 35.0 °C  | 45.0 °C  |
| 0.02     | 2.31(2)                                             | 5.34(2) | 13.38(9) | 36.1(2)  |
| 0.03     | 3.4(1)                                              | 7.97(1) | 19.8(2)  | 52.7(4)  |
| 0.04     | 4.51(3)                                             | 10.6(3) | 26.2(4)  | 67.4(1)  |
| 0.05     | 5.57(2)                                             | 13.2(6) | 32.9(2)  | 82.5(4)  |
| 0.1      | 11.0(8)                                             | 26.4(8) | 65.6(1)  | 157(8)   |
| 0.2      | 21.7(6)                                             | 52.7(3) | 131.1(7) | 308.5(9) |

Figure S5a: Plot of k<sub>obs</sub> vs [Py] for the reaction between *fac*-[Re(Trop)(CO)<sub>3</sub>(MeOH)] and pyridine at different temperatures. [Re] = 1.0 x 10<sup>-4</sup> M, [Py] = 2.0 x 10<sup>-2</sup> M – 2.0 x 10<sup>-1</sup> M, 312 nm, MeOH.

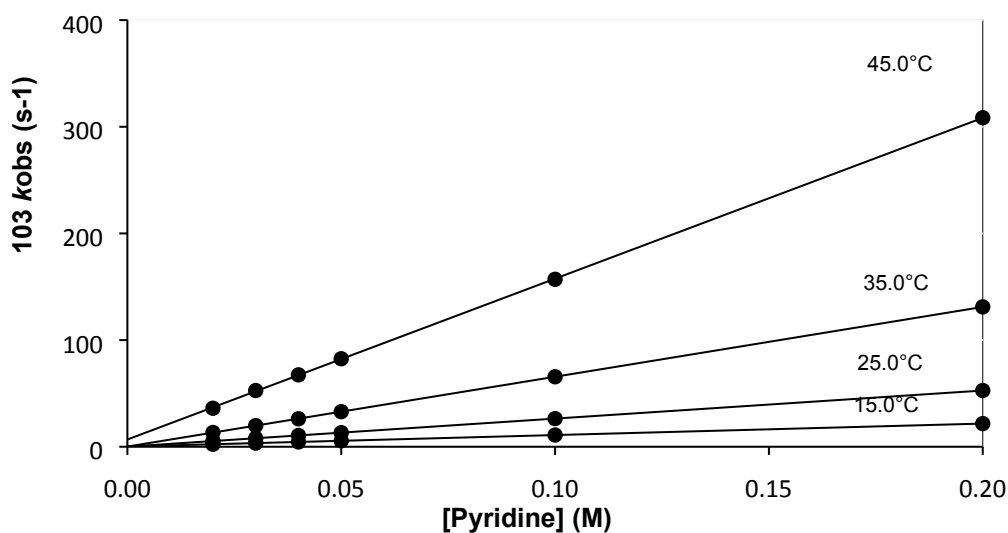

Figure S5b: Global fit of the Eyring Eq for k<sub>obs</sub> vs [Py] for the reaction between *fac*-[Re(Trop)(CO)<sub>3</sub>(MeOH)] and pyridine at different temperatures. [Re] = 1.0 x 10<sup>-4</sup> M, [Py] = 2.0 x 10<sup>-2</sup> M – 2.0 x 10<sup>-1</sup> M, 312 nm, MeOH.

Results from Global fit:

$$\Delta H^\ddagger = (67 \pm 1) \text{ kJ mol}^{-1}; \Delta S^\ddagger = (-30 \pm 3) \text{ JK}^{-1} \text{ mol}^{-1}.$$

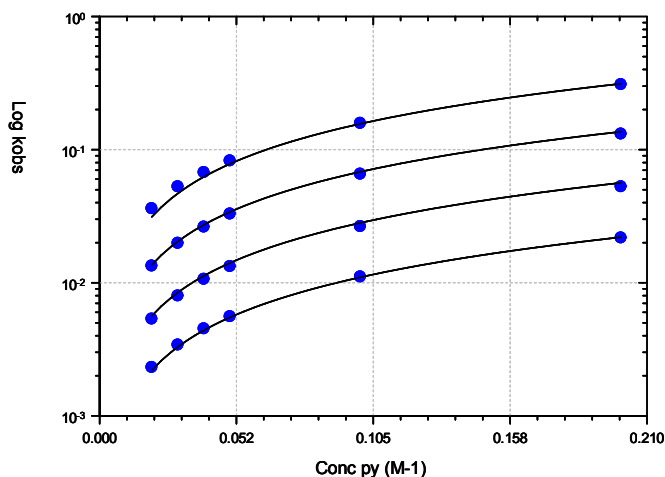

**Table S6: Summary of the rate constants and activation parameters of the reaction between *fac*-[Re(Trop)(CO)<sub>3</sub>(MeOH)] and pyridine at different temperatures.**

|                                                                    | 15.0 °C   | 25.0 °C   | 35.0 °C    | 45.0 °C  |
|--------------------------------------------------------------------|-----------|-----------|------------|----------|
| $k_L$ (M <sup>-1</sup> s <sup>-1</sup> )                           | 0.1077(2) | 0.2632(1) | 0.6546(6)  | 1.508(4) |
| $10^3 k_L$ (s <sup>-1</sup> )                                      | 0.18(2)   | 0.07(1)   | 0.16(6)    | 6.8(4)   |
| $K_L$ (M <sup>-1</sup> )                                           | 598(66)   | 3760(537) | 4091(1534) | 222(13)  |
| $\Delta H^\ddagger_{(k_L)}$ (kJ mol <sup>-1</sup> )                |           | 64.7(9)   |            |          |
| $\Delta S^\ddagger_{(k_L)}$ (J K <sup>-1</sup> mol <sup>-1</sup> ) |           | -39(3)    |            |          |

**Figure S6: Eyring plot of  $\ln(k_L/T)$  vs  $1/T$  for the reaction between *fac*-[Re(Trop)(CO)<sub>3</sub>(MeOH)] and pyridine for a temperature range of 15.0 °C to 45.0 °C.**

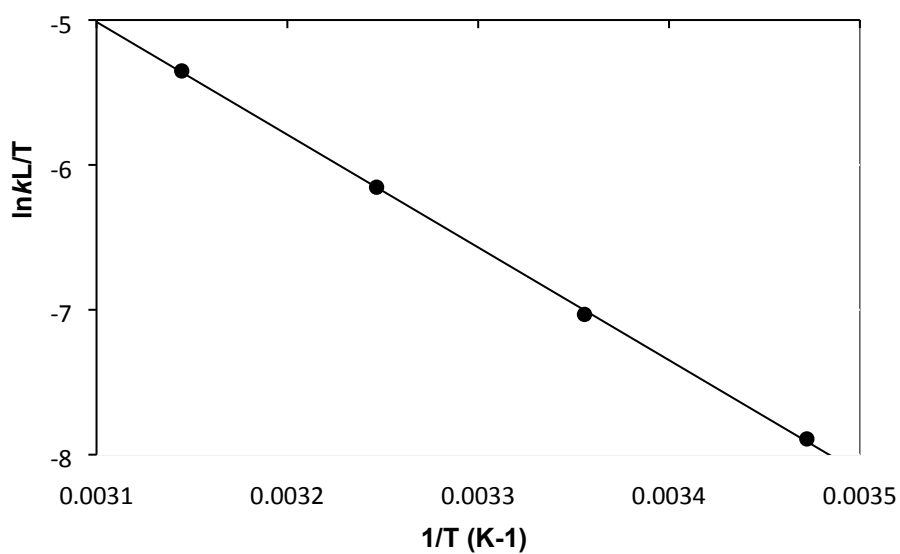

**Table S7:** Temperature and [Im] dependence of the *pseudo* first-order reaction between *fac*-[Re(Trop)(CO)<sub>3</sub>(MeOH)] and imidazole. [Re] = 1 × 10<sup>-4</sup> M, λ = 255 nm, MeOH.

| [Im] (M) | 10 <sup>3</sup> k <sub>obs</sub> (s <sup>-1</sup> ) |          |         |          |
|----------|-----------------------------------------------------|----------|---------|----------|
|          | 15.0 °C                                             | 25.0 °C  | 35.0 °C | 45.0 °C  |
| 0.005    | 0.87(2)                                             | 1.826(9) | 4.63(2) | 10.65(4) |
| 0.01     | 1.47(1)                                             | 3.45(4)  | 8.05(2) | 18.6(3)  |
| 0.02     | 2.69(4)                                             | 6.22(3)  | 14.8(2) | 32.8(6)  |
| 0.03     | 3.9(1)                                              | 8.91(2)  | 21.4(7) | 49.0(8)  |
| 0.04     | 5.10(6)                                             | 12.0(4)  | 28.3(4) | 63.9(2)  |
| 0.05     | 6.31(2)                                             | 14.80(9) | 35.1(2) | 79(1)    |

**Figure S7:** Plot of k<sub>obs</sub> vs [Im] for the reaction between *fac*-[Re(Trop)(CO)<sub>3</sub>(MeOH)] and imidazole at different temperatures. [Re] = 1.0 × 10<sup>-4</sup> M, [Im] = 5.0 × 10<sup>-3</sup> – 5.0 × 10<sup>-2</sup> M, 255 nm, MeOH.

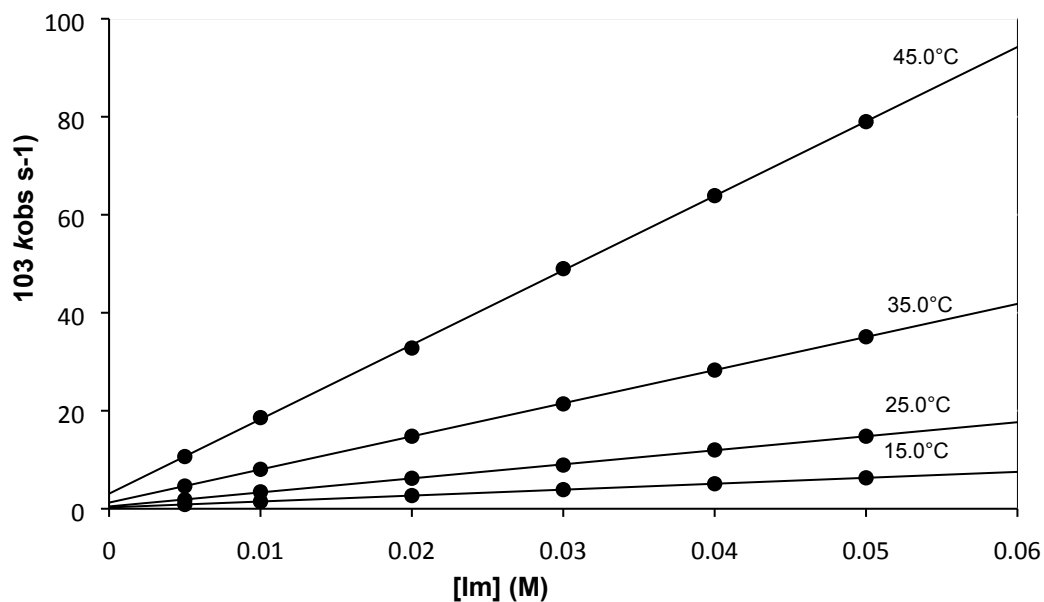



**Table S8: Summary of the rate constants and activation parameters of the reaction between *fac*-[Re(Trop)(CO)<sub>3</sub>(MeOH)] and imidazole at different temperatures.**

|                                                                    | 15.0 °C   | 25.0 °C  | 35.0 °C  | 45.0 °C |
|--------------------------------------------------------------------|-----------|----------|----------|---------|
| $k_L$ (M <sup>-1</sup> s <sup>-1</sup> )                           | 0.1209(1) | 0.287(3) | 0.676(2) | 1.52(1) |
| $10^3 k_L$ (s <sup>-1</sup> )                                      | 0.266(4)  | 0.46(9)  | 1.25(6)  | 3.1(3)  |
| $K_L$ (M <sup>-1</sup> )                                           | 455(7)    | 624(122) | 541(26)  | 490(48) |
| $\Delta H^\ddagger_{(k_L)}$ (kJ mol <sup>-1</sup> )                |           | 61.8(7)  |          |         |
| $\Delta S^\ddagger_{(k_L)}$ (J K <sup>-1</sup> mol <sup>-1</sup> ) |           | -48(2)   |          |         |

**Figure S8: Eyring plot of  $\ln(k_L/T)$  vs  $1/T$  for the reaction between *fac*-[Re(Trop)(CO)<sub>3</sub>(MeOH)] and imidazole for a temperature range of 15.0 °C to 45.0 °C.**

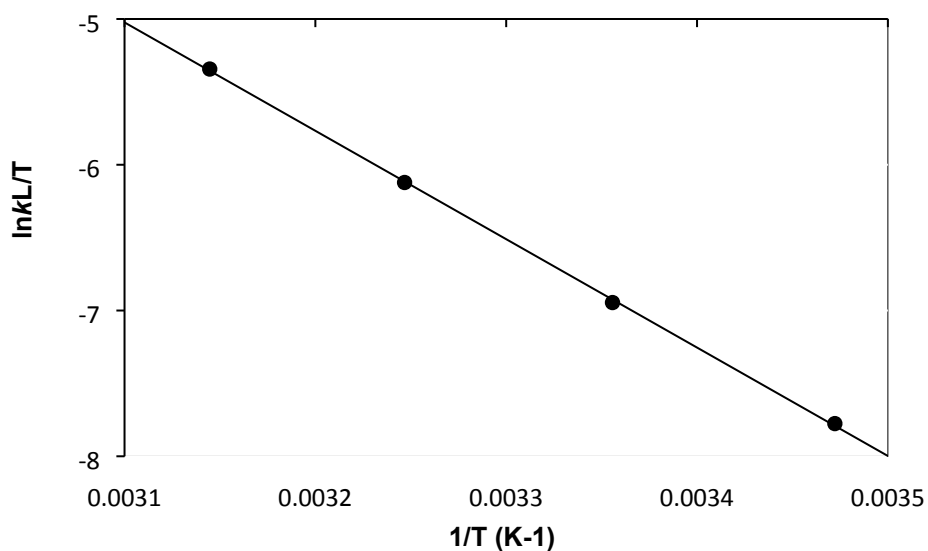

**Table S9: Temperature and [NCS<sup>-</sup>] dependence of the *pseudo* first-order reaction between *fac*-[Re(Trop)(CO)<sub>3</sub>(MeOH)] and thiocyanate ions. [Re] = 1 x 10<sup>-4</sup> M, λ = 265 nm, MeOH.**

| [NCS <sup>-</sup> ] (M) | 10 <sup>3</sup> k <sub>obs</sub> (s <sup>-1</sup> ) |          |         |          |
|-------------------------|-----------------------------------------------------|----------|---------|----------|
|                         | 15.0 °C                                             | 25.0 °C  | 35.0 °C | 45.0 °C  |
| 0.02                    | 3.80(2)                                             | 9.2(1)   | 24.2(7) | 48.6(9)  |
| 0.03                    | 4.93(1)                                             | 12.5(3)  | 29.6(4) | 59.9(3)  |
| 0.04                    | 6.13(4)                                             | 15.2(3)  | 35.1(9) | 72.0(7)  |
| 0.05                    | 7.193(6)                                            | 18.12(9) | 41(2)   | 83.33(8) |
| 0.1                     | 12.2(4)                                             | 31.51(6) | 72.1(3) | 149(3)   |
| 0.2                     | 22.16(6)                                            | 57.87(9) | 136(2)  | 279(1)   |

**Figure S9: Plot of k<sub>obs</sub> vs [NCS<sup>-</sup>] for the reaction between *fac*-[Re(Trop)(CO)<sub>3</sub>(MeOH)] and NCS<sup>-</sup> ions at different temperatures. [Re] = 1.0 x 10<sup>-4</sup> M, [NCS<sup>-</sup>] = 2.0 x 10<sup>-2</sup> – 2.0 x 10<sup>-1</sup> M, 265 nm, MeOH.**

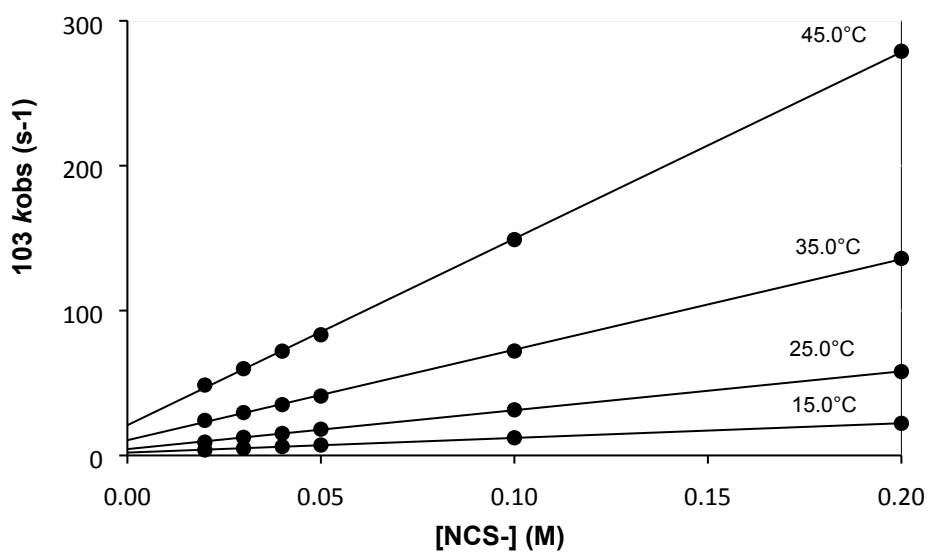

**Table S10: Summary of the rate constants and activation parameters of the reaction between *fac*-[Re(Trop)(CO)<sub>3</sub>(MeOH)] and NCS<sup>-</sup> ions at different temperatures.**

|                                                                    | 15.0 °C  | 25.0 °C  | 35.0 °C  | 45.0 °C |
|--------------------------------------------------------------------|----------|----------|----------|---------|
| $k_L$ (M <sup>-1</sup> s <sup>-1</sup> )                           | 0.101(1) | 0.268(2) | 0.625(6) | 1.29(1) |
| $10^3 k_L$ (s <sup>-1</sup> )                                      | 2.0(1)   | 4.4(2)   | 10.5(6)  | 20.9(9) |
| $K_L$ (M <sup>-1</sup> )                                           | 51(3)    | 61(3)    | 60(3)    | 62(3)   |
| $\Delta H^\ddagger_{(k_L)}$ (kJ mol <sup>-1</sup> )                |          | 62(2)    |          |         |
| $\Delta S^\ddagger_{(k_L)}$ (J K <sup>-1</sup> mol <sup>-1</sup> ) |          | -48(6)   |          |         |

**Figure S10: Eyring plot of  $\ln(k_L/T)$  vs  $1/T$  for the reaction between *fac*-[Re(Trop)(CO)<sub>3</sub>(MeOH)] and NCS<sup>-</sup> ions for a temperature range of 15.0 °C to 45.0 °C.**

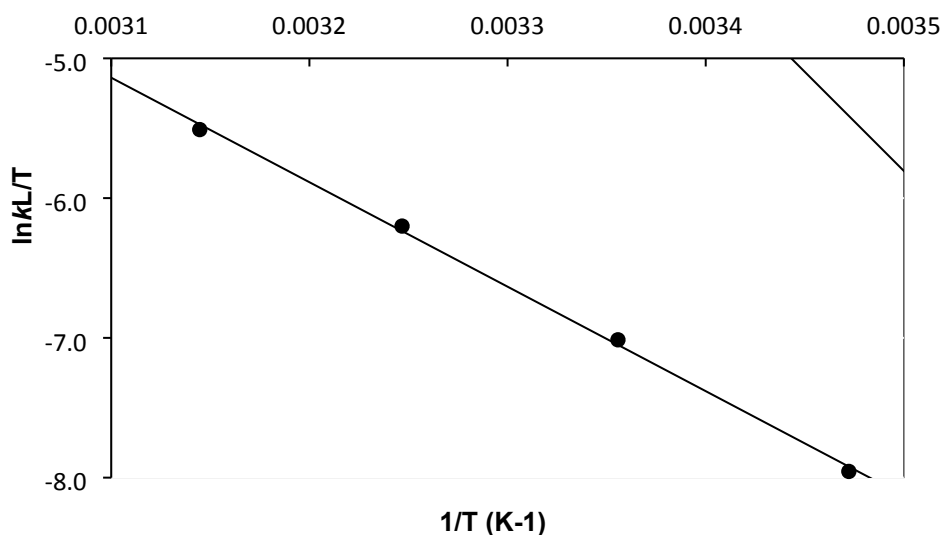

**Table S11: Temperature and [DMAP] dependence of the *pseudo* first-order reaction between *fac*-[Re(Trop)(CO)<sub>3</sub>(MeOH)] and 4-dimethylaminopyridine. [Re] = 1 x 10<sup>-4</sup> M, λ = 318 nm, MeOH.**

| [DMAP] (M) | 10 <sup>3</sup> <i>k</i> <sub>obs</sub> (s <sup>-1</sup> ) |         |          |         |
|------------|------------------------------------------------------------|---------|----------|---------|
|            | 15.0 °C                                                    | 25.0 °C | 35.0 °C  | 45.0 °C |
| 0.005      | 1.37(4)                                                    | 3.31(4) | 6.75(3)  | 13.1(3) |
| 0.01       | 2.14(3)                                                    | 5.17(6) | 11.09(8) | 22.9(6) |
| 0.02       | 3.7(1)                                                     | 8.56(9) | 18.9(6)  | 41.1(8) |
| 0.03       | 5.27(8)                                                    | 11.8(3) | 26.9(4)  | 59.9(7) |
| 0.04       | 6.83(2)                                                    | 15.4(3) | 35.7(7)  | 79.9(6) |
| 0.05       | 8.4(1)                                                     | 18.7(2) | 44(1)    | 99(8)   |

**Figure S11: Plot of *k*<sub>obs</sub> vs [DMAP] for the reaction between *fac*-[Re(Trop)(CO)<sub>3</sub>(MeOH)] and DMAP at different temperatures. [Re] = 1.0 x 10<sup>-4</sup> M, [DMAP] = 5.0 x 10<sup>-3</sup> – 5.0 x 10<sup>-2</sup> M, 318 nm, MeOH.**

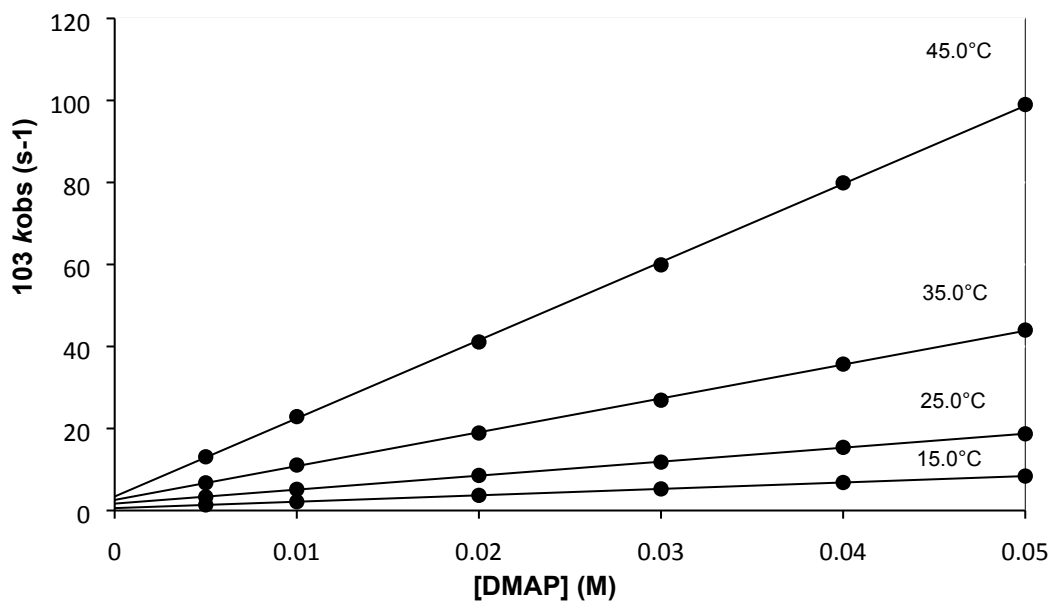

**Table S12: Summary of the rate constants and activation parameters of the reaction between *fac*-[Re(Trop)(CO)<sub>3</sub>(MeOH)] and DMAP at different temperatures.**

|                                                                    | 15.0 °C   | 25.0 °C  | 35.0 °C  | 45.0 °C |
|--------------------------------------------------------------------|-----------|----------|----------|---------|
| $k_L$ (M <sup>-1</sup> s <sup>-1</sup> )                           | 0.1563(2) | 0.341(2) | 0.825(7) | 1.91(1) |
| $10^3 k_L$ (s <sup>-1</sup> )                                      | 0.581(5)  | 1.68(7)  | 2.6(2)   | 3.4(4)  |
| $K_L$ (M <sup>-1</sup> )                                           | 269(2)    | 203(9)   | 317(25)  | 562(66) |
| $\Delta H^\ddagger_{(k_L)}$ (kJ mol <sup>-1</sup> )                |           | 61(2)    |          |         |
| $\Delta S^\ddagger_{(k_L)}$ (J K <sup>-1</sup> mol <sup>-1</sup> ) |           | -47(7)   |          |         |

**Figure S12: Eyring plot of  $\ln(k_L/T)$  vs  $1/T$  for the reaction between *fac*-[Re(Trop)(CO)<sub>3</sub>(MeOH)] and DMAP for a temperature range of 15.0 °C to 45.0 °C.**

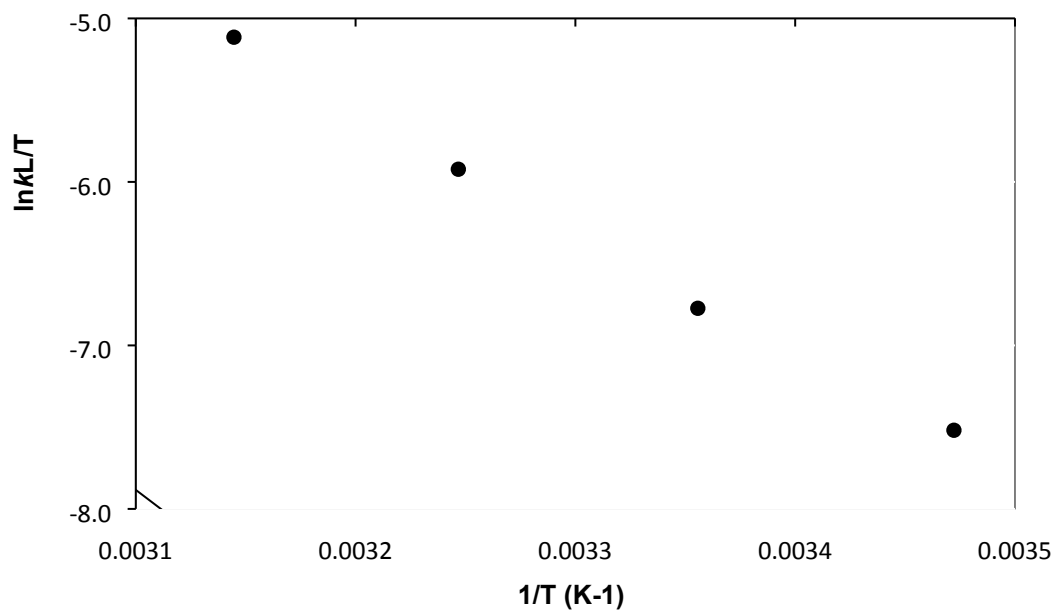

Table S13: Temperature and [TU] dependence of the *pseudo* first-order reaction between *fac*-[Re(Trop)(CO)<sub>3</sub>(MeOH)] and thiourea. [Re] = 1 × 10<sup>-4</sup> M, λ = 440 nm, MeOH.

| [TU] (M) | 10 <sup>3</sup> k <sub>obs</sub> (s <sup>-1</sup> ) |          |          |          |
|----------|-----------------------------------------------------|----------|----------|----------|
|          | 15.0 °C                                             | 25.0 °C  | 35.0 °C  | 45.0 °C  |
| 0.005    | 1.61(4)                                             | 3.710(8) | 10.0(8)  | 27.31(9) |
| 0.01     | 2.74(2)                                             | 6.62(4)  | 15.7(2)  | 40.8(4)  |
| 0.02     | 5.28(4)                                             | 12.1(8)  | 27.6(2)  | 66.7(2)  |
| 0.03     | 7.79(9)                                             | 17.5(2)  | 41.1(4)  | 95(1)    |
| 0.04     | 10.2(2)                                             | 23.14(8) | 53.10(8) | 120.9(6) |
| 0.05     | 12.7(1)                                             | 28.91(9) | 66(1)    | 147(2)   |

Figure S13a: Plot of k<sub>obs</sub> vs [TU] for the reaction between *fac*-[Re(Trop)(CO)<sub>3</sub>(MeOH)] and thiourea at different temperatures. [Re] = 1.0 × 10<sup>-4</sup> M, [TU] = 5.0 × 10<sup>-3</sup> – 5.0 × 10<sup>-2</sup> M, 440 nm, MeOH.

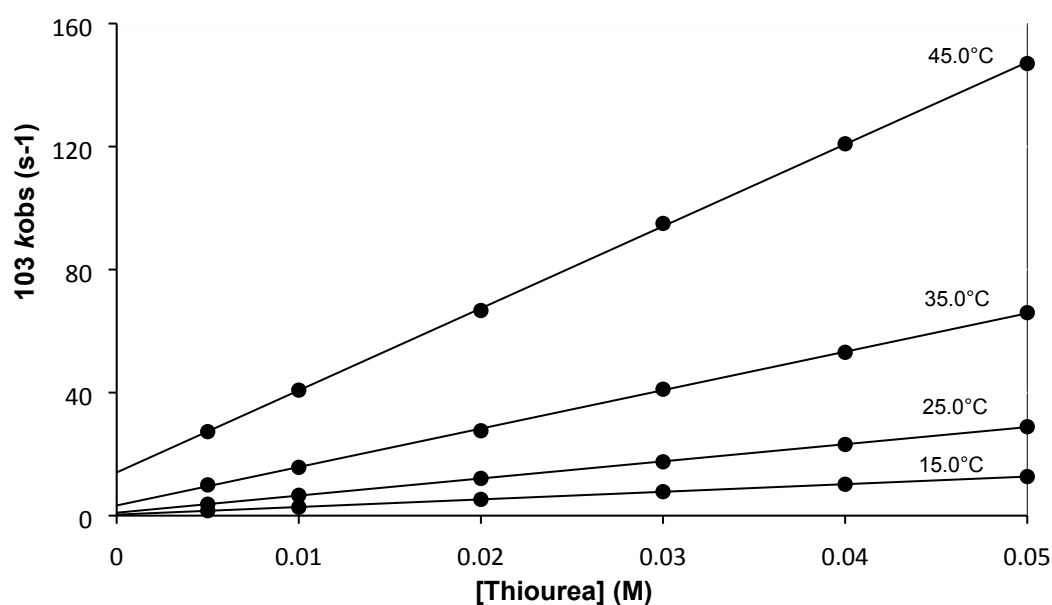

Figure S13b: Plot of A<sub>obs</sub> vs [TU] for the reaction of *fac*-[Re(Trop)(CO)<sub>3</sub>(MeOH)] with thiourea. [Re] = 1.0 × 10<sup>-4</sup> M, 25.0 °C, 440 nm.

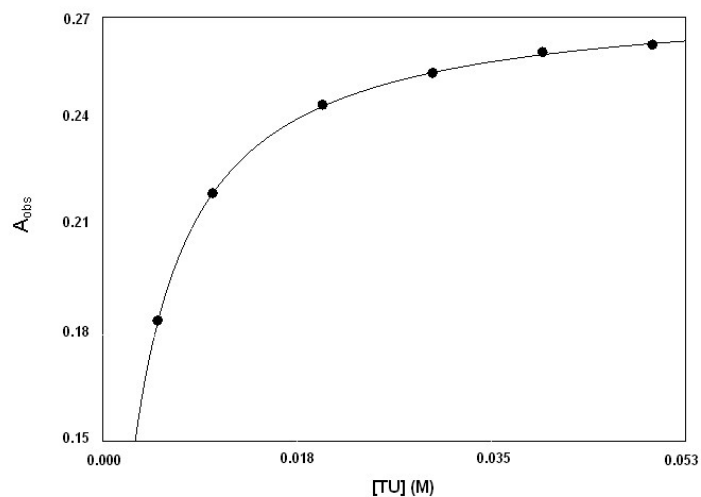

**Table S14: Summary of the rate constants and activation parameters of the reaction between *fac*-[Re(Trop)(CO)<sub>3</sub>(MeOH)] and thiourea at different temperatures.**

|                                                                    | 15.0 °C  | 25.0 °C  | 35.0 °C | 45.0 °C |
|--------------------------------------------------------------------|----------|----------|---------|---------|
| $k_L$ (M <sup>-1</sup> s <sup>-1</sup> )                           | 0.247(1) | 0.556(3) | 1.25(1) | 2.67(2) |
| $10^3 k_L$ (s <sup>-1</sup> )                                      | 0.33(3)  | 0.95(10) | 3.3(4)  | 14.0(5) |
| $K_L$ (M <sup>-1</sup> )                                           | 748(68)  | 585(62)  | 379(46) | 191(7)  |
| $K_L$ (M <sup>-1</sup> ) <sup>a</sup>                              | 808(74)  | 373(35)  | 355(48) | 344(33) |
| $\Delta H^\ddagger_{(k_L)}$ (kJ mol <sup>-1</sup> )                |          | 58.0(7)  |         |         |
| $\Delta S^\ddagger_{(k_L)}$ (J K <sup>-1</sup> mol <sup>-1</sup> ) |          | -55(2)   |         |         |

<sup>a</sup> Thermodynamically determined.

**Figure S14: Eyring plot of  $\ln(k_L/T)$  vs  $1/T$  for the reaction between *fac*-[Re(Trop)(CO)<sub>3</sub>(MeOH)] and thiourea for a temperature range of 15.0 °C to 45.0 °C.**

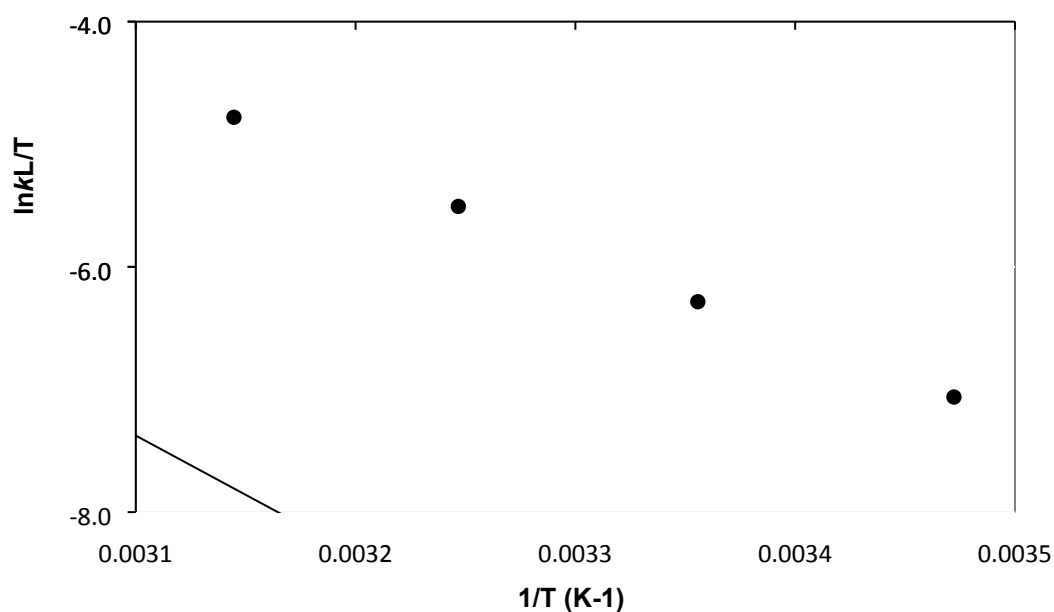

Table S15: Temperature and [MeTU] dependence of the *pseudo* first-order reaction between *fac*-[Re(Trop)(CO)<sub>3</sub>(MeOH)] and 1-methyl-2-thiourea. [Re] = 1 x 10<sup>-4</sup> M, λ = 435 nm, MeOH.

| [MeTU] (M) | 10 <sup>3</sup> k <sub>obs</sub> (s <sup>-1</sup> ) |         |         |         |
|------------|-----------------------------------------------------|---------|---------|---------|
|            | 15.0 °C                                             | 25.0 °C | 35.0 °C | 45.0 °C |
| 0.005      | 2.1(1)                                              | 5.00(3) | 12.7(6) | 33.6(3) |
| 0.01       | 3.31(4)                                             | 8.12(4) | 19.6(2) | 49.1(2) |
| 0.02       | 6.05(2)                                             | 14.3(2) | 33.4(7) | 79.2(4) |
| 0.03       | 8.68(7)                                             | 20.6(3) | 47.1(8) | 109(3)  |
| 0.04       | 11.3(2)                                             | 26.8(4) | 61.0(9) | 139(7)  |
| 0.05       | 14.0(6)                                             | 33.2(3) | 74.6(2) | 169(8)  |

Figure S15: Plot of k<sub>obs</sub> vs [MeTU] for the reaction between *fac*-[Re(Trop)(CO)<sub>3</sub>(MeOH)] and MeTU at different temperatures. [Re] = 1.0 x 10<sup>-4</sup> M, [MeTU] = 5.0 x 10<sup>-3</sup> – 5.0 x 10<sup>-2</sup> M, 435 nm, MeOH.

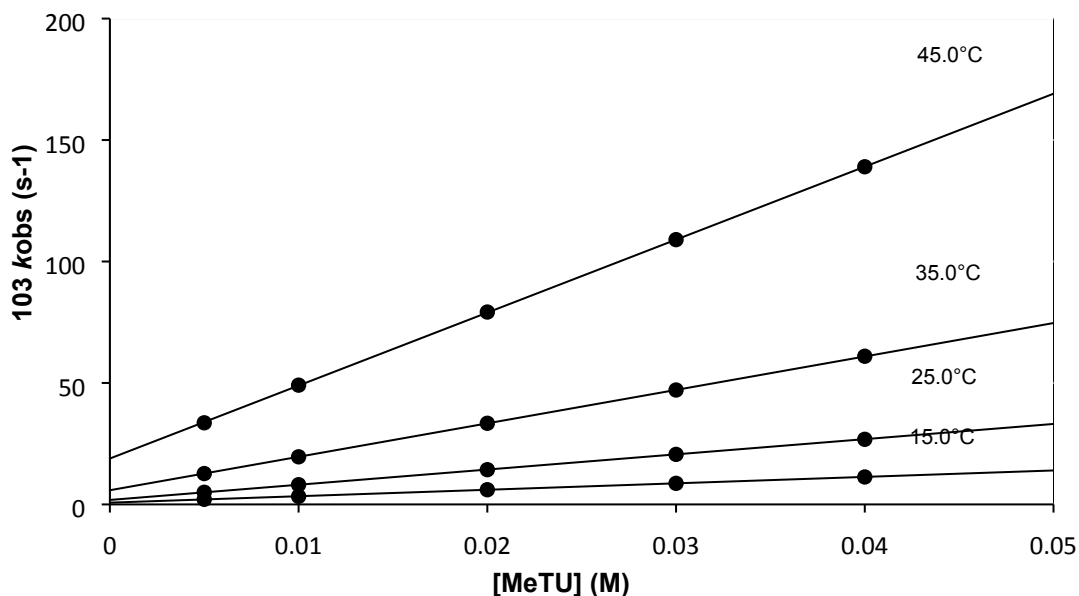



**Table S16: Summary of the rate constants and activation parameters of the reaction between *fac*-[Re(Trop)(CO)<sub>3</sub>(MeOH)] and MeTU at different temperatures.**

|                                                                    | 15.0 °C  | 25.0 °C  | 35.0 °C  | 45.0 °C  |
|--------------------------------------------------------------------|----------|----------|----------|----------|
| $k_L$ (M <sup>-1</sup> s <sup>-1</sup> )                           | 0.265(1) | 0.626(2) | 1.377(2) | 3.004(6) |
| $10^3 k_L$ (s <sup>-1</sup> )                                      | 0.73(4)  | 1.84(5)  | 5.84(5)  | 18.9(2)  |
| $K_L$ (M <sup>-1</sup> )                                           | 363(20)  | 340(9)   | 236(2)   | 159(2)   |
| $\Delta H^\ddagger_{(k_L)}$ (kJ mol <sup>-1</sup> )                |          | 59.0(4)  |          |          |
| $\Delta S^\ddagger_{(k_L)}$ (J K <sup>-1</sup> mol <sup>-1</sup> ) |          | -51(1)   |          |          |

**Figure S16: Eyring plot of  $\ln(k_L/T)$  vs  $1/T$  for the reaction between *fac*-[Re(Trop)(CO)<sub>3</sub>(MeOH)] and MeTU for a temperature range of 15.0 °C to 45.0 °C.**

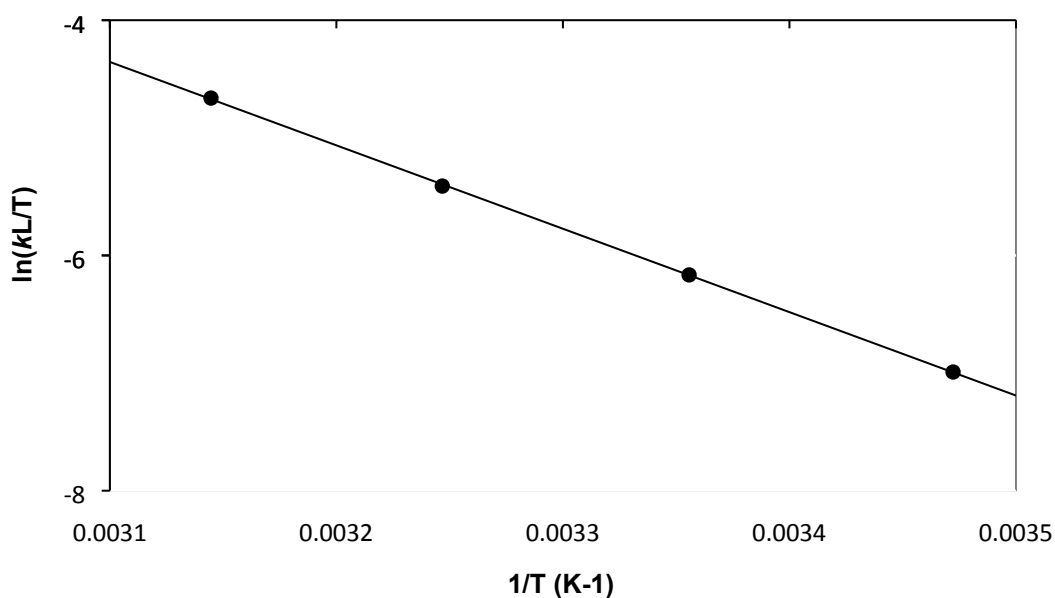

Figure S17: Plot of  $k_{\text{obs}}$  vs [ligand] of the reactions between *fac*-[Re(Trop)(CO)<sub>3</sub>(MeOH)] and various entering ligands at ~25 °C.

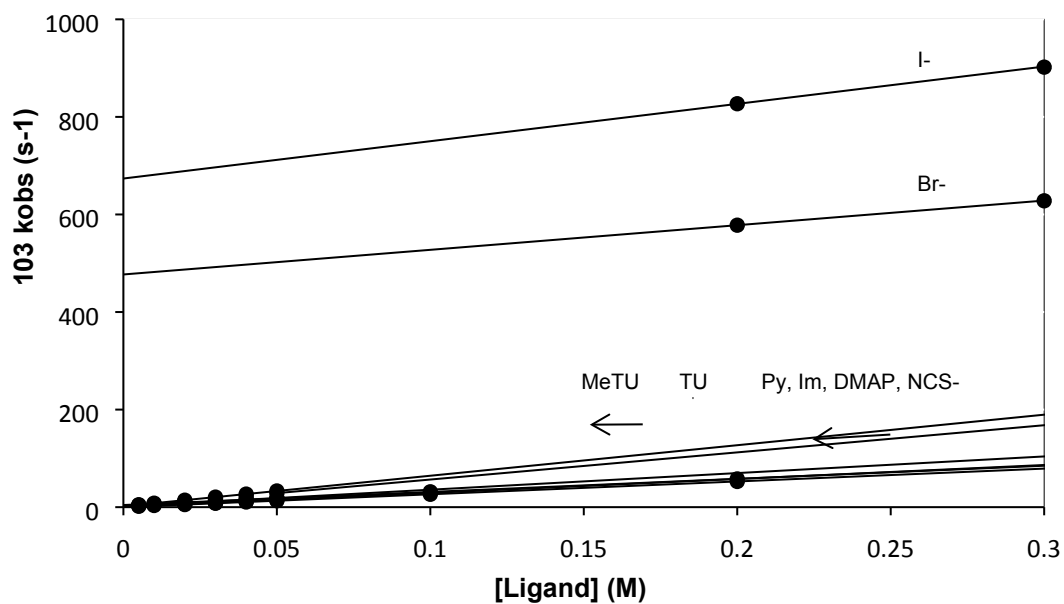

The methanol substitution reactions between *fac*-[Re(Trop)(CO)<sub>3</sub>(MeOH)] and pyridine (Py), imidazole (Im), thiourea (TU) and 1-methyl-2-thiourea as entering ligands were followed. Each reaction was performed at six pressures (0.6, 5, 10, 50, 80 and 100 MPa) and the Rhenium concentration was kept constant at  $1 \times 10^{-4}$  M throughout.

**Table S17a: Pressure dependence of the *pseudo* first-order reaction between *fac*-[Re(Trop)(CO)<sub>3</sub>(MeOH)] and pyridine. [Re] = 1 x 10<sup>-4</sup> M, [Py] = 5 x 10<sup>-2</sup> M, λ = 312 nm, 25.9 °C, MeOH.**

| Pressure (MPa) | <i>k</i> <sub>obs</sub> |
|----------------|-------------------------|
| 0.6            | 0.0113(7)               |
| 5              | 0.0111(7)               |
| 10             | 0.0107(3)               |
| 50             | 0.00929(9)              |
| 80             | 0.0081(2)               |
| 100            | 0.00755(7)              |

**Table S17b: Pressure dependence of the *pseudo* first-order reaction between *fac*-[Re(Trop)(CO)<sub>3</sub>(MeOH)] and imidazole. [Re] = 1 x 10<sup>-4</sup> M, [Im] = 5 x 10<sup>-2</sup> M, λ = 450 nm, 25.8 °C, MeOH.**

| Pressure (MPa) | <i>k</i> <sub>obs</sub> |
|----------------|-------------------------|
| 0.6            | 0.0177(2)               |
| 5              | 0.0172(4)               |
| 10             | 0.0169(8)               |
| 50             | 0.0145(9)               |
| 80             | 0.0131(7)               |
| 100            | 0.0123(3)               |

**Table S17c: Pressure dependence of the *pseudo* first-order reaction between *fac*-[Re(Trop)(CO)<sub>3</sub>(MeOH)] and thiourea. [Re] = 1 x 10<sup>-4</sup> M, [TU] = 5 x 10<sup>-2</sup> M, λ = 440 nm, 25.6 °C, MeOH.**

| Pressure (MPa) | <i>k</i> <sub>obs</sub> |
|----------------|-------------------------|
| 0.6            | 0.0342(3)               |
| 5              | 0.033(2)                |
| 10             | 0.032(1)                |
| 50             | 0.028(1)                |
| 80             | 0.0246(7)               |
| 100            | 0.0225(6)               |

**Table S17d: Pressure dependence of the *pseudo* first-order reaction between *fac*-[Re(Trop)(CO)<sub>3</sub>(MeOH)] and 1-methyl-2-thiourea. [Re] = 1 x 10<sup>-4</sup> M, [MeTU] = 5 x 10<sup>-2</sup> M, λ = 435 nm, 25.9 °C, MeOH.**

| Pressure (MPa) | <i>k</i> <sub>obs</sub> |
|----------------|-------------------------|
| 0.6            | 0.042(1)                |
| 5              | 0.0409(7)               |
| 10             | 0.0389(6)               |
| 50             | 0.0316(6)               |
| 80             | 0.0262(9)               |
| 100            | 0.0234(3)               |
